# Supplementary material
Source: PubMed Central journal article supplement (PMC6738833)
Supplement: jin-0007-0315-s01.pdf [file jin-0007-0315-s01.pdf]

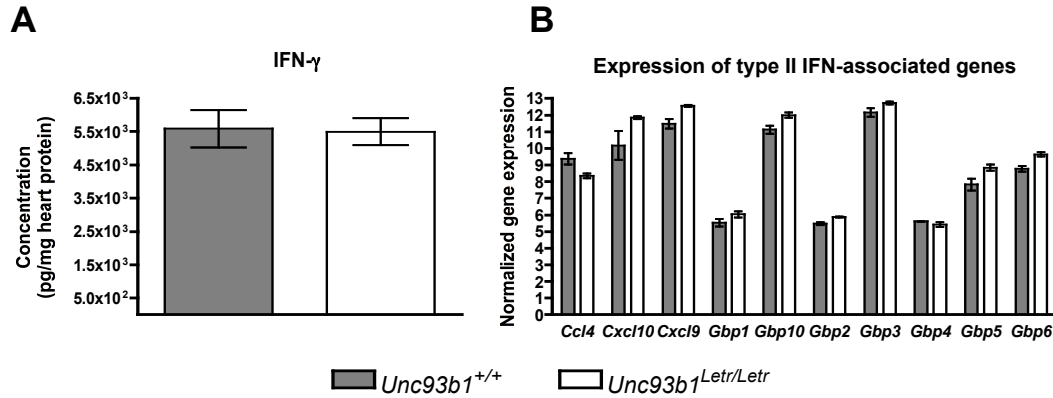

**Supplementary Figure 1: Loss of *Unc93b1* does not affect type II IFN-mediated immune signaling.** (A) Expression of cardiac IFN- $\gamma$  (type II IFN) at day 2 post-infection from *Unc93b1*<sup>+/+</sup> (grey) and *Unc93b1*<sup>Letr/Letr</sup> (white) mice. (B) Normalized gene expression of type II IFN-associated genes at day 2 post-infection derived from microarray analysis of cardiac tissue from *Unc93b1*<sup>+/+</sup> and *Unc93b1*<sup>Letr/Letr</sup> mice.
